# Supplementary material for: A New General-Purpose Algorithm for Mixed-Integer Bilevel Linear Programs
Source: Atypon-hosted journal article supplement (doi:10.1287/opre.2017.1650), 2017-09-18
Supplement: opre.2017.1650-sm.pdf [file opre.2017.1650-sm.pdf]

# A new general-purpose algorithm for mixed-integer bilevel linear programs

Matteo Fischetti <sup>\*1</sup>, Ivana Ljubić <sup>†2</sup>, Michele Monaci <sup>‡3</sup>, and Markus Sinnl <sup>§4</sup>

<sup>1</sup>*DEI, University of Padua, Italy.*

<sup>2</sup>*ESSEC Business School of Paris, France.*

<sup>2</sup>*DEI, University of Bologna, Italy.*

<sup>4</sup>*ISOR, University of Vienna, Vienna, Austria.*

June 29, 2016

## Abstract

This appendix contains detailed computational results for all the instances in the testbed of the paper *A new general-purpose algorithm for mixed-integer bilevel linear programs*. A technical report of this paper is available at <http://homepage.univie.ac.at/markus.sinnl/program-codes/bilevel/>.

## Instance Set DENEGRÉ

The instances are available at <http://coral.ise.lehigh.edu/data-sets/bilevel-instances/detailed-bilevel-instances-mips-random/>

Table 1: Results for instance set DENEGRÉ.

| instance                  | BestSol | LB         | %gap | time [s] |
|---------------------------|---------|------------|------|----------|
| miblp-20-15-50-0110-10-10 | -206    | -206.0000  | 0.00 | 0.32     |
| miblp-20-15-50-0110-10-1  | -388    | -388.0000  | 0.00 | 0.91     |
| miblp-20-15-50-0110-10-2  | -398    | -398.0000  | 0.00 | 7.83     |
| miblp-20-15-50-0110-10-3  | -42     | -42.0000   | 0.00 | 2.41     |
| miblp-20-15-50-0110-10-4  | -729    | -729.0000  | 0.00 | 0.55     |
| miblp-20-15-50-0110-10-5  | -281    | -281.0000  | 0.00 | 0.45     |
| miblp-20-15-50-0110-10-6  | -246    | -246.0000  | 0.00 | 15.91    |
| miblp-20-15-50-0110-10-7  | -260    | -260.0000  | 0.00 | 0.44     |
| miblp-20-15-50-0110-10-8  | -293    | -293.0000  | 0.00 | 0.39     |
| miblp-20-15-50-0110-10-9  | -635    | -635.0000  | 0.00 | 0.50     |
| miblp-20-20-50-0110-10-10 | -441    | -441.0000  | 0.00 | 2927.10  |
| miblp-20-20-50-0110-10-1  | -359    | -359.0000  | 0.00 | 1.70     |
| miblp-20-20-50-0110-10-2  | -659    | -659.0000  | 0.00 | 0.70     |
| miblp-20-20-50-0110-10-3  | -618    | -618.0000  | 0.00 | 0.27     |
| miblp-20-20-50-0110-10-4  | -604    | -604.0000  | 0.00 | 0.50     |
| miblp-20-20-50-0110-10-5  | -1003   | -1003.0000 | 0.00 | 0.22     |
| miblp-20-20-50-0110-10-6  | -731    | -731.0000  | 0.00 | 9.91     |
| miblp-20-20-50-0110-10-7  | -683    | -683.0000  | 0.00 | 0.29     |
| miblp-20-20-50-0110-10-8  | -667    | -667.0000  | 0.00 | 15.11    |
| miblp-20-20-50-0110-10-9  | -256    | -256.0000  | 0.00 | 0.47     |
| miblp-20-20-50-0110-15-10 | -251    | -251.0000  | 0.00 | 0.44     |

---

\*matteo.fischetti@unipd.it

†ivana.ljubic@essec.edu

‡michele.monaci@unibo.it

§markus.sinnl@univie.ac.at

Table 1 – continued from previous page

| instance                 | BestSol | LB         | %gap | time [s] |
|--------------------------|---------|------------|------|----------|
| miblp-20-20-50-0110-15-1 | -450    | -450.0000  | 0.00 | 0.34     |
| miblp-20-20-50-0110-15-2 | -645    | -645.0000  | 0.00 | 0.29     |
| miblp-20-20-50-0110-15-3 | -593    | -593.0000  | 0.00 | 3.15     |
| miblp-20-20-50-0110-15-4 | -441    | -441.0000  | 0.00 | 5.06     |
| miblp-20-20-50-0110-15-5 | -379    | -379.0000  | 0.00 | 1392.23  |
| miblp-20-20-50-0110-15-6 | -596    | -596.0000  | 0.00 | 49.85    |
| miblp-20-20-50-0110-15-7 | -471    | -471.0000  | 0.00 | 0.34     |
| miblp-20-20-50-0110-15-8 | -370    | -370.0000  | 0.00 | 0.27     |
| miblp-20-20-50-0110-15-9 | -584    | -584.0000  | 0.00 | 0.22     |
| miblp-20-20-50-0110-5-10 | -340    | -340.0000  | 0.00 | 0.49     |
| miblp-20-20-50-0110-5-11 | -426    | -426.0000  | 0.00 | 0.30     |
| miblp-20-20-50-0110-5-12 | -854    | -854.0000  | 0.00 | 0.05     |
| miblp-20-20-50-0110-5-13 | -519    | -519.0000  | 0.00 | 0.02     |
| miblp-20-20-50-0110-5-14 | -923    | -923.0000  | 0.00 | 0.16     |
| miblp-20-20-50-0110-5-15 | -617    | -617.0000  | 0.00 | 0.54     |
| miblp-20-20-50-0110-5-16 | -833    | -833.0000  | 0.00 | 0.30     |
| miblp-20-20-50-0110-5-17 | -944    | -944.0000  | 0.00 | 0.10     |
| miblp-20-20-50-0110-5-18 | -386    | -386.0000  | 0.00 | 0.11     |
| miblp-20-20-50-0110-5-19 | -431    | -431.0000  | 0.00 | 0.13     |
| miblp-20-20-50-0110-5-1  | -548    | -548.0000  | 0.00 | 0.14     |
| miblp-20-20-50-0110-5-20 | -438    | -438.0000  | 0.00 | 0.03     |
| miblp-20-20-50-0110-5-2  | -591    | -591.0000  | 0.00 | 0.03     |
| miblp-20-20-50-0110-5-3  | -477    | -477.0000  | 0.00 | 0.03     |
| miblp-20-20-50-0110-5-4  | -753    | -753.0000  | 0.00 | 0.07     |
| miblp-20-20-50-0110-5-5  | -392    | -392.0000  | 0.00 | 0.30     |
| miblp-20-20-50-0110-5-6  | -1061   | -1061.0000 | 0.00 | 0.32     |
| miblp-20-20-50-0110-5-7  | -547    | -547.0000  | 0.00 | 0.37     |
| miblp-20-20-50-0110-5-8  | -936    | -936.0000  | 0.00 | 0.36     |
| miblp-20-20-50-0110-5-9  | -877    | -877.0000  | 0.00 | 0.35     |

# Instance Set MIPLIB

The instances are available at <http://homepage.univie.ac.at/markus.sinnl/program-codes/bilevel/>.

Table 2: Results for instance set MIPLIB.

| instance     | BestSol  | LB            | %gap  | time [s] |
|--------------|----------|---------------|-------|----------|
| air03-0.1    | 379800   | 344940.6202   | 9.18  | 3600.00  |
| air03-0.5    | 512698   | 360653.0000   | 29.66 | 3600.00  |
| air03-0.9    | 770100   | 358130.7506   | 53.50 | 3600.00  |
| air04-0.1    | 56399    | 56291.5472    | 0.19  | 3600.00  |
| air04-0.5    | 60076    | 56224.6292    | 6.41  | 3600.00  |
| air04-0.9    | 73759    | 56035.8472    | 24.03 | 3600.00  |
| air05-0.1    | 26577    | 26577.0000    | 0.00  | 401.27   |
| air05-0.5    | 31290    | 26469.7692    | 15.41 | 3600.00  |
| air05-0.9    | 40558    | 26350.2340    | 35.03 | 3600.00  |
| cap6000-0.1  | -1967015 | -1967015.0000 | 0.00  | 586.98   |
| cap6000-0.5  | -        | -2400881.8508 | -     | 3600.00  |
| cap6000-0.9  | -        | -2372513.7387 | -     | 3600.00  |
| enigma-0.1   | 0        | 0.0000        | 0.00  | 0.28     |
| enigma-0.5   | 0        | 0.0000        | 0.00  | 6.20     |
| enigma-0.9   | 0        | 0.0000        | 0.00  | 185.65   |
| fast0507-0.1 | 12484    | 12484.0000    | 0.00  | 1.86     |
| fast0507-0.5 | 61439    | 61439.0000    | 0.00  | 1.74     |
| fast0507-0.9 | 109916   | 109916.0000   | 0.00  | 1.49     |
| l152lav-0.1  | 4722     | 4722.0000     | 0.00  | 2.21     |
| l152lav-0.5  | 4868     | 4758.5000     | 2.25  | 3600.00  |
| l152lav-0.9  | 5072     | 4785.3277     | 5.65  | 3600.00  |
| lseu-0.1     | 1120     | 1120.0000     | 0.00  | 0.07     |
| lseu-0.5     | 2313     | 2036.3864     | 11.96 | 3600.00  |
| lseu-0.9     | 5838     | 5838.0000     | 0.00  | 64.85    |
| mitre-0.1    | 122235   | 115310.6145   | 5.66  | 3600.00  |
| mitre-0.5    | -        | 115492.2852   | -     | 3600.00  |
| mitre-0.9    | -        | 115493.3824   | -     | 3600.00  |
| mod010-0.1   | 6554     | 6554.0000     | 0.00  | 4.20     |
| mod010-0.5   | 6618     | 6573.4891     | 0.67  | 3600.00  |
| mod010-0.9   | 7355     | 6565.6667     | 10.73 | 3600.00  |
| nw04-0.1     | 17066    | 17066.0000    | 0.00  | 1139.69  |
| nw04-0.5     | 24100    | 16689.4706    | 30.75 | 3600.00  |
| nw04-0.9     | 52290    | 18241.2202    | 65.12 | 3600.00  |
| p0033-0.1    | 3089     | 3089.0000     | 0.00  | 0.03     |
| p0033-0.5    | 3095     | 3095.0000     | 0.00  | 0.02     |
| p0033-0.9    | 4679     | 4679.0000     | 0.00  | 0.13     |
| p0201-0.1    | 12555    | 9724.8337     | 22.54 | 3600.00  |
| p0201-0.5    | 13635    | 13635.0000    | 0.00  | 1113.28  |
| p0201-0.9    | 15025    | 15025.0000    | 0.00  | 0.98     |
| p0282-0.1    | 260781   | 260781.0000   | 0.00  | 3.87     |
| p0282-0.5    | 272659   | 267014.5318   | 2.07  | 3600.00  |
| p0282-0.9    | 616034   | 398553.0624   | 35.30 | 3600.00  |
| p0548-0.1    | 11051    | 9115.1458     | 17.52 | 3600.00  |
| p0548-0.5    | -        | 11358.4606    | -     | 3600.00  |
| p0548-0.9    | 49509    | 19026.7330    | 61.57 | 3600.00  |
| p2756-0.1    | 12862    | 3338.0000     | 74.05 | 3600.00  |
| p2756-0.5    | 25384    | 4077.6628     | 83.94 | 3600.00  |
| p2756-0.9    | 33623    | 4685.3819     | 86.06 | 3600.00  |
| seymour-0.1  | 476      | 469.9485      | 1.27  | 3600.00  |
| seymour-0.5  | 807      | 807.0000      | 0.00  | 2.11     |
| seymour-0.9  | 1251     | 1251.0000     | 0.00  | 0.54     |
| stein27-0.1  | 18       | 18.0000       | 0.00  | 0.25     |
| stein27-0.5  | 19       | 19.0000       | 0.00  | 0.02     |
| stein27-0.9  | 24       | 24.0000       | 0.00  | 0.01     |
| stein45-0.1  | 30       | 30.0000       | 0.00  | 2.59     |
| stein45-0.5  | 32       | 32.0000       | 0.00  | 0.10     |
| stein45-0.9  | 40       | 40.0000       | 0.00  | 0.01     |

# Instance Set XUWANG

The instances are available at <http://lzwang.public.iastate.edu/bmilplib.html>.

Table 3: Results for instance set XUWANG.

| instance          | BestSol | LB        | %gap | time [s] |
|-------------------|---------|-----------|------|----------|
| bmilplib-10-10b1  | -449    | -449.0000 | 0.00 | 0.02     |
| bmilplib-10-1b1   | -352    | -351.8333 | 0.00 | 0.01     |
| bmilplib-10-2b1   | -229    | -229.0000 | 0.00 | 0.02     |
| bmilplib-10-3b1   | -460    | -460.0000 | 0.00 | 0.03     |
| bmilplib-10-4b1   | -250    | -250.0000 | 0.00 | 0.04     |
| bmilplib-10-5b1   | -329    | -328.6000 | 0.00 | 0.04     |
| bmilplib-10-6b1   | -223    | -223.0000 | 0.00 | 0.04     |
| bmilplib-10-7b1   | -307    | -307.0000 | 0.00 | 0.02     |
| bmilplib-10-8b1   | -76     | -76.5000  | 0.00 | 0.04     |
| bmilplib-10-9b1   | -79     | -79.0000  | 0.00 | 0.02     |
| bmilplib-110-10b1 | -188    | -187.5556 | 0.00 | 9.47     |
| bmilplib-110-1b1  | -184    | -184.1333 | 0.00 | 0.31     |
| bmilplib-110-2b1  | -111    | -110.6667 | 0.00 | 0.41     |
| bmilplib-110-3b1  | -236    | -236.0000 | 0.00 | 0.11     |
| bmilplib-110-4b1  | -197    | -197.2860 | 0.00 | 0.18     |
| bmilplib-110-5b1  | -195    | -194.7377 | 0.00 | 0.12     |
| bmilplib-110-6b1  | -148    | -148.2500 | 0.00 | 0.73     |
| bmilplib-110-7b1  | -161    | -160.8643 | 0.00 | 0.27     |
| bmilplib-110-8b1  | -155    | -155.0000 | 0.00 | 0.69     |
| bmilplib-110-9b1  | -193    | -192.9213 | 0.00 | 0.25     |
| bmilplib-160-10b1 | -190    | -189.8182 | 0.00 | 1.55     |
| bmilplib-160-1b1  | -165    | -165.0000 | 0.00 | 0.53     |
| bmilplib-160-2b1  | -178    | -178.2355 | 0.00 | 1.10     |
| bmilplib-160-3b1  | -175    | -174.9448 | 0.00 | 2.62     |
| bmilplib-160-4b1  | -136    | -135.9469 | 0.00 | 1.49     |
| bmilplib-160-5b1  | -141    | -140.7778 | 0.00 | 2.08     |
| bmilplib-160-6b1  | -111    | -111.0000 | 0.00 | 0.61     |
| bmilplib-160-7b1  | -96     | -96.0000  | 0.00 | 2.71     |
| bmilplib-160-8b1  | -181    | -181.4000 | 0.00 | 0.44     |
| bmilplib-160-9b1  | -208    | -207.5000 | 0.00 | 0.32     |
| bmilplib-210-10b1 | -131    | -130.5847 | 0.00 | 2.37     |
| bmilplib-210-1b1  | -137    | -136.8000 | 0.00 | 0.90     |
| bmilplib-210-2b1  | -118    | -117.8000 | 0.00 | 1.71     |
| bmilplib-210-3b1  | -131    | -130.8000 | 0.00 | 1.09     |
| bmilplib-210-4b1  | -162    | -162.1985 | 0.00 | 0.81     |
| bmilplib-210-5b1  | -134    | -134.0000 | 0.00 | 2.40     |
| bmilplib-210-6b1  | -125    | -125.4286 | 0.00 | 2.51     |
| bmilplib-210-7b1  | -170    | -169.7258 | 0.00 | 3.39     |
| bmilplib-210-8b1  | -101    | -101.4571 | 0.00 | 1.31     |
| bmilplib-210-9b1  | -184    | -184.0000 | 0.00 | 4.95     |
| bmilplib-260-10b1 | -155    | -155.0000 | 0.00 | 7.64     |
| bmilplib-260-1b1  | -139    | -139.0000 | 0.00 | 2.21     |
| bmilplib-260-2b1  | -83     | -82.6250  | 0.00 | 4.14     |
| bmilplib-260-3b1  | -144    | -144.2500 | 0.00 | 2.17     |
| bmilplib-260-4b1  | -117    | -117.3333 | 0.00 | 5.98     |
| bmilplib-260-5b1  | -121    | -121.0000 | 0.00 | 2.99     |
| bmilplib-260-6b1  | -124    | -124.0000 | 0.00 | 4.64     |
| bmilplib-260-7b1  | -138    | -137.8000 | 0.00 | 6.49     |
| bmilplib-260-8b1  | -120    | -119.8889 | 0.00 | 2.32     |
| bmilplib-260-9b1  | -160    | -160.0000 | 0.00 | 3.74     |
| bmilplib-310-10b1 | -142    | -141.8595 | 0.00 | 2.63     |
| bmilplib-310-1b1  | -117    | -117.0000 | 0.00 | 2.76     |
| bmilplib-310-2b1  | -105    | -105.0000 | 0.00 | 7.83     |
| bmilplib-310-3b1  | -128    | -127.5231 | 0.00 | 8.91     |
| bmilplib-310-4b1  | -148    | -147.7826 | 0.00 | 13.11    |
| bmilplib-310-5b1  | -161    | -161.4500 | 0.00 | 3.09     |
| bmilplib-310-6b1  | -141    | -141.1798 | 0.00 | 14.63    |
| bmilplib-310-7b1  | -142    | -142.0000 | 0.00 | 14.41    |
| bmilplib-310-8b1  | -115    | -115.3431 | 0.00 | 5.88     |
| bmilplib-310-9b1  | -116    | -115.6491 | 0.00 | 3.76     |
| bmilplib-360-10b1 | -109    | -108.5926 | 0.00 | 12.05    |
| bmilplib-360-1b1  | -133    | -133.0000 | 0.00 | 15.15    |
| bmilplib-360-2b1  | -138    | -138.4349 | 0.00 | 27.84    |
| bmilplib-360-3b1  | -131    | -131.0000 | 0.00 | 9.78     |
| bmilplib-360-4b1  | -119    | -119.0000 | 0.00 | 11.76    |
| bmilplib-360-5b1  | -167    | -167.0000 | 0.00 | 6.89     |
| bmilplib-360-6b1  | -110    | -110.1242 | 0.00 | 13.04    |

Table 3 – continued from previous page

| instance          | BestSol | LB        | %gap | time [s] |
|-------------------|---------|-----------|------|----------|
| bmilplib-360-7b1  | -105    | -105.0000 | 0.00 | 6.35     |
| bmilplib-360-8b1  | -98     | -98.2500  | 0.00 | 16.46    |
| bmilplib-360-9b1  | -127    | -127.2222 | 0.00 | 7.31     |
| bmilplib-410-10b1 | -153    | -153.3671 | 0.00 | 42.14    |
| bmilplib-410-1b1  | -104    | -103.5043 | 0.00 | 18.45    |
| bmilplib-410-2b1  | -109    | -108.5953 | 0.00 | 9.64     |
| bmilplib-410-3b1  | -96     | -96.2377  | 0.00 | 29.22    |
| bmilplib-410-4b1  | -120    | -119.5000 | 0.00 | 6.77     |
| bmilplib-410-5b1  | -119    | -119.2188 | 0.00 | 20.04    |
| bmilplib-410-6b1  | -151    | -151.3077 | 0.00 | 8.36     |
| bmilplib-410-7b1  | -123    | -123.0000 | 0.00 | 7.87     |
| bmilplib-410-8b1  | -126    | -125.7837 | 0.00 | 10.55    |
| bmilplib-410-9b1  | -101    | -100.7683 | 0.00 | 21.57    |
| bmilplib-460-10b1 | -103    | -102.5143 | 0.00 | 22.01    |
| bmilplib-460-1b1  | -98     | -97.5882  | 0.00 | 21.61    |
| bmilplib-460-2b1  | -139    | -139.0000 | 0.00 | 8.96     |
| bmilplib-460-3b1  | -87     | -86.5021  | 0.00 | 23.13    |
| bmilplib-460-4b1  | -107    | -107.0305 | 0.00 | 35.65    |
| bmilplib-460-5b1  | -100    | -100.4955 | 0.00 | 21.76    |
| bmilplib-460-6b1  | -107    | -107.0000 | 0.00 | 21.71    |
| bmilplib-460-7b1  | -84     | -83.7500  | 0.00 | 34.72    |
| bmilplib-460-8b1  | -115    | -115.3878 | 0.00 | 23.87    |
| bmilplib-460-9b1  | -129    | -128.7011 | 0.00 | 19.58    |
| bmilplib-60-10b1  | -186    | -186.2051 | 0.00 | 0.23     |
| bmilplib-60-1b1   | -154    | -153.5633 | 0.00 | 1.09     |
| bmilplib-60-2b1   | -145    | -144.6667 | 0.00 | 0.11     |
| bmilplib-60-3b1   | -251    | -251.4429 | 0.00 | 0.10     |
| bmilplib-60-4b1   | -234    | -234.0000 | 0.00 | 0.08     |
| bmilplib-60-5b1   | -116    | -116.4000 | 0.00 | 0.42     |
| bmilplib-60-6b1   | -189    | -189.2927 | 0.00 | 0.08     |
| bmilplib-60-7b1   | -182    | -181.7200 | 0.00 | 0.07     |
| bmilplib-60-8b1   | -232    | -232.1212 | 0.00 | 0.22     |
| bmilplib-60-9b1   | -136    | -136.5000 | 0.00 | 1.25     |
| bmilplib-10-10b2  | -463    | -463.0000 | 0.00 | 0.16     |
| bmilplib-10-1b2   | -332    | -332.1667 | 0.00 | 0.07     |
| bmilplib-10-2b2   | -301    | -300.5714 | 0.00 | 0.02     |
| bmilplib-10-3b2   | -484    | -484.0000 | 0.00 | 0.57     |
| bmilplib-10-4b2   | -304    | -304.0000 | 0.00 | 0.02     |
| bmilplib-10-5b2   | -337    | -336.6000 | 0.00 | 0.06     |
| bmilplib-10-6b2   | 39      | 39.0000   | 0.00 | 2.66     |
| bmilplib-10-7b2   | -238    | -238.0000 | 0.00 | 0.10     |
| bmilplib-10-8b2   | -88     | -88.3571  | 0.00 | 0.08     |
| bmilplib-10-9b2   | -130    | -129.8182 | 0.00 | 0.03     |
| bmilplib-110-10b2 | -251    | -251.0000 | 0.00 | 122.50   |
| bmilplib-110-1b2  | -231    | -231.3333 | 0.00 | 15.89    |
| bmilplib-110-2b2  | -206    | -206.0000 | 0.00 | 1.66     |
| bmilplib-110-3b2  | -288    | -287.9412 | 0.00 | 1.89     |
| bmilplib-110-4b2  | -258    | -258.0000 | 0.00 | 8.18     |
| bmilplib-110-5b2  | -301    | -300.7385 | 0.00 | 1.31     |
| bmilplib-110-6b2  | -239    | -239.3246 | 0.00 | 25.47    |
| bmilplib-110-7b2  | -237    | -237.0000 | 0.00 | 14.53    |
| bmilplib-110-8b2  | -250    | -250.3364 | 0.00 | 4.74     |
| bmilplib-110-9b2  | -280    | -280.0204 | 0.00 | 1.26     |
| bmilplib-160-10b2 | -255    | -255.0729 | 0.00 | 123.31   |
| bmilplib-160-1b2  | -252    | -251.8606 | 0.00 | 7.69     |
| bmilplib-160-2b2  | -268    | -267.5918 | 0.00 | 38.47    |
| bmilplib-160-3b2  | -260    | -260.2500 | 0.00 | 20.56    |
| bmilplib-160-4b2  | -222    | -222.0000 | 0.00 | 90.87    |
| bmilplib-160-5b2  | -241    | -240.9444 | 0.00 | 34.08    |
| bmilplib-160-6b2  | -230    | -230.0606 | 0.00 | 3.78     |
| bmilplib-160-7b2  | -208    | -207.7575 | 0.00 | 40.23    |
| bmilplib-160-8b2  | -266    | -266.0000 | 0.00 | 2.75     |
| bmilplib-160-9b2  | -290    | -289.6000 | 0.00 | 12.44    |
| bmilplib-210-10b2 | -230    | -230.0000 | 0.00 | 106.99   |
| bmilplib-210-1b2  | -235    | -234.7209 | 0.00 | 1.37     |
| bmilplib-210-2b2  | -218    | -217.7500 | 0.00 | 73.68    |
| bmilplib-210-3b2  | -224    | -223.6522 | 0.00 | 27.74    |
| bmilplib-210-4b2  | -245    | -245.4167 | 0.00 | 40.98    |
| bmilplib-210-5b2  | -233    | -233.2500 | 0.00 | 121.06   |
| bmilplib-210-6b2  | -214    | -213.8182 | 0.00 | 76.41    |
| bmilplib-210-7b2  | -260    | -259.5106 | 0.00 | 37.21    |
| bmilplib-210-8b2  | -197    | -196.7472 | 0.00 | 13.44    |
| bmilplib-210-9b2  | -292    | -292.3627 | 0.00 | 69.86    |
| bmilplib-260-10b2 | -229    | -229.2000 | 0.00 | 768.71   |

Table 3 – continued from previous page

| instance          | BestSol | LB        | %gap | time [s] |
|-------------------|---------|-----------|------|----------|
| bmilplib-260-1b2  | -242    | -241.5000 | 0.00 | 18.74    |
| bmilplib-260-2b2  | -192    | -191.8750 | 0.00 | 37.27    |
| bmilplib-260-3b2  | -227    | -227.4356 | 0.00 | 128.85   |
| bmilplib-260-4b2  | -225    | -225.0000 | 0.00 | 152.17   |
| bmilplib-260-5b2  | -218    | -218.0000 | 0.00 | 80.74    |
| bmilplib-260-6b2  | -207    | -207.0000 | 0.00 | 487.92   |
| bmilplib-260-7b2  | -227    | -227.0000 | 0.00 | 282.02   |
| bmilplib-260-8b2  | -217    | -217.0000 | 0.00 | 133.31   |
| bmilplib-260-9b2  | -230    | -229.6667 | 0.00 | 1149.97  |
| bmilplib-310-10b2 | -222    | -221.7910 | 0.00 | 374.59   |
| bmilplib-310-1b2  | -212    | -212.0000 | 0.00 | 142.11   |
| bmilplib-310-2b2  | -213    | -212.5714 | 0.00 | 93.31    |
| bmilplib-310-3b2  | -234    | -233.8114 | 0.00 | 192.91   |
| bmilplib-310-4b2  | -258    | -258.2688 | 0.00 | 104.78   |
| bmilplib-310-5b2  | -254    | -254.1811 | 0.00 | 337.83   |
| bmilplib-310-6b2  | -224    | -224.3333 | 0.00 | 1135.21  |
| bmilplib-310-7b2  | -235    | -234.7043 | 0.00 | 710.06   |
| bmilplib-310-8b2  | -218    | -217.9601 | 0.00 | 50.42    |
| bmilplib-310-9b2  | -206    | -205.9665 | 0.00 | 317.47   |
| bmilplib-360-10b2 | -208    | -208.3491 | 0.00 | 261.25   |
| bmilplib-360-1b2  | -215    | -215.0000 | 0.00 | 2564.55  |
| bmilplib-360-2b2  | -227    | -227.3768 | 0.00 | 2668.17  |
| bmilplib-360-3b2  | -229    | -229.0000 | 0.00 | 512.91   |
| bmilplib-360-4b2  | -224    | -224.0000 | 0.00 | 270.74   |
| bmilplib-360-5b2  | -253    | -253.0000 | 0.00 | 896.66   |
| bmilplib-360-6b2  | -232    | -232.4400 | 0.00 | 21.91    |
| bmilplib-360-7b2  | -223    | -222.7143 | 0.00 | 407.97   |
| bmilplib-360-8b2  | -207    | -206.8000 | 0.00 | 99.58    |
| bmilplib-360-9b2  | -227    | -227.0000 | 0.00 | 286.52   |
| bmilplib-410-10b2 | -241    | -250.3735 | 3.89 | 3600.00  |
| bmilplib-410-1b2  | -202    | -201.5000 | 0.00 | 299.19   |
| bmilplib-410-2b2  | -230    | -230.0000 | 0.00 | 33.30    |
| bmilplib-410-3b2  | -196    | -195.9776 | 0.00 | 714.75   |
| bmilplib-410-4b2  | -232    | -232.0033 | 0.00 | 156.61   |
| bmilplib-410-5b2  | -210    | -209.5000 | 0.00 | 796.23   |
| bmilplib-410-6b2  | -244    | -244.0000 | 0.00 | 349.61   |
| bmilplib-410-7b2  | -218    | -218.2857 | 0.00 | 568.76   |
| bmilplib-410-8b2  | -237    | -236.8333 | 0.00 | 227.73   |
| bmilplib-410-9b2  | -208    | -207.6923 | 0.00 | 647.59   |
| bmilplib-460-10b2 | -209    | -209.0345 | 0.00 | 1047.34  |
| bmilplib-460-1b2  | -202    | -202.0000 | 0.00 | 1553.11  |
| bmilplib-460-2b2  | -224    | -224.0000 | 0.00 | 750.37   |
| bmilplib-460-2    | -139    | -139.0000 | 0.00 | 9.58     |
| bmilplib-460-3b2  | -184    | -184.0000 | 0.00 | 650.88   |
| bmilplib-460-3    | -87     | -86.5021  | 0.00 | 23.56    |
| bmilplib-460-4b2  | -212    | -211.8235 | 0.00 | 2261.18  |
| bmilplib-460-5b2  | -215    | -215.4462 | 0.00 | 484.51   |
| bmilplib-460-6b2  | -203    | -203.2333 | 0.00 | 1190.47  |
| bmilplib-460-7b2  | -187    | -187.3979 | 0.00 | 501.34   |
| bmilplib-460-8b2  | -207    | -207.0000 | 0.00 | 2144.19  |
| bmilplib-460-9b2  | -225    | -225.0000 | 0.00 | 2684.42  |
| bmilplib-60-10b2  | -285    | -285.0363 | 0.00 | 0.72     |
| bmilplib-60-1b2   | -218    | -218.2640 | 0.00 | 11.08    |
| bmilplib-60-2b2   | -218    | -218.0000 | 0.00 | 2.64     |
| bmilplib-60-3b2   | -300    | -300.0429 | 0.00 | 0.17     |
| bmilplib-60-4b2   | -305    | -305.2500 | 0.00 | 0.15     |
| bmilplib-60-5b2   | -188    | -188.2000 | 0.00 | 11.15    |
| bmilplib-60-6b2   | -272    | -272.2714 | 0.00 | 0.37     |
| bmilplib-60-7b2   | -252    | -252.0000 | 0.00 | 0.19     |
| bmilplib-60-8b2   | -311    | -311.3333 | 0.00 | 1.72     |
| bmilplib-60-9b2   | -216    | -216.4286 | 0.00 | 12.61    |
| bmilplib-10-10    | -444    | -444.3333 | 0.00 | 2.95     |
| bmilplib-10-1     | -352    | -351.8333 | 0.00 | 2.90     |
| bmilplib-10-2     | -229    | -229.0000 | 0.00 | 2.64     |
| bmilplib-10-3     | -437    | -437.0000 | 0.00 | 2.93     |
| bmilplib-10-4     | -250    | -250.0000 | 0.00 | 2.83     |
| bmilplib-10-5     | -264    | -263.6000 | 0.00 | 2.35     |
| bmilplib-10-6     | -67     | -67.0000  | 0.00 | 3.05     |
| bmilplib-10-7     | -224    | -224.0000 | 0.00 | 1.99     |
| bmilplib-10-8     | -66     | -66.5000  | 0.00 | 2.63     |
| bmilplib-10-9     | -79     | -79.0000  | 0.00 | 1.86     |
| bmilplib-110-10   | -178    | -177.6667 | 0.00 | 12.08    |
| bmilplib-110-1    | -182    | -181.6667 | 0.00 | 1.78     |
| bmilplib-110-2    | -111    | -110.6667 | 0.00 | 1.32     |

Table 3 – continued from previous page

| instance        | BestSol | LB        | %gap | time [s] |
|-----------------|---------|-----------|------|----------|
| bmilplib-110-3  | -215    | -215.1600 | 0.00 | 1.69     |
| bmilplib-110-4  | -197    | -197.2860 | 0.00 | 1.80     |
| bmilplib-110-5  | -195    | -194.7377 | 0.00 | 1.28     |
| bmilplib-110-6  | -148    | -148.2500 | 0.00 | 2.29     |
| bmilplib-110-7  | -161    | -160.8643 | 0.00 | 1.37     |
| bmilplib-110-8  | -155    | -155.0000 | 0.00 | 2.08     |
| bmilplib-110-9  | -193    | -192.9213 | 0.00 | 2.07     |
| bmilplib-160-10 | -190    | -189.8182 | 0.00 | 2.68     |
| bmilplib-160-1  | -165    | -165.0000 | 0.00 | 1.93     |
| bmilplib-160-2  | -178    | -178.2355 | 0.00 | 1.63     |
| bmilplib-160-3  | -175    | -174.9448 | 0.00 | 3.00     |
| bmilplib-160-4  | -136    | -135.8333 | 0.00 | 2.42     |
| bmilplib-160-5  | -141    | -140.7778 | 0.00 | 2.75     |
| bmilplib-160-6  | -111    | -111.0000 | 0.00 | 1.12     |
| bmilplib-160-7  | -96     | -96.0000  | 0.00 | 3.51     |
| bmilplib-160-8  | -181    | -181.4000 | 0.00 | 1.20     |
| bmilplib-160-9  | -208    | -207.5000 | 0.00 | 1.18     |
| bmilplib-210-10 | -131    | -130.5847 | 0.00 | 3.00     |
| bmilplib-210-1  | -137    | -136.8000 | 0.00 | 1.66     |
| bmilplib-210-2  | -118    | -117.8000 | 0.00 | 2.58     |
| bmilplib-210-3  | -131    | -130.8000 | 0.00 | 1.30     |
| bmilplib-210-4  | -162    | -162.1985 | 0.00 | 1.16     |
| bmilplib-210-5  | -134    | -134.0000 | 0.00 | 2.51     |
| bmilplib-210-6  | -125    | -125.4286 | 0.00 | 2.94     |
| bmilplib-210-7  | -170    | -169.7258 | 0.00 | 3.43     |
| bmilplib-210-8  | -101    | -101.4571 | 0.00 | 1.74     |
| bmilplib-210-9  | -184    | -184.0000 | 0.00 | 5.21     |
| bmilplib-260-10 | -152    | -151.7310 | 0.00 | 10.91    |
| bmilplib-260-1  | -139    | -139.0000 | 0.00 | 2.93     |
| bmilplib-260-2  | -83     | -82.6250  | 0.00 | 4.35     |
| bmilplib-260-3  | -144    | -144.2500 | 0.00 | 2.89     |
| bmilplib-260-4  | -117    | -117.3333 | 0.00 | 5.98     |
| bmilplib-260-5  | -121    | -121.0000 | 0.00 | 3.21     |
| bmilplib-260-6  | -124    | -124.0000 | 0.00 | 4.82     |
| bmilplib-260-7  | -138    | -137.8000 | 0.00 | 5.55     |
| bmilplib-260-8  | -120    | -119.8889 | 0.00 | 2.50     |
| bmilplib-260-9  | -160    | -160.0000 | 0.00 | 6.57     |
| bmilplib-310-10 | -142    | -141.8595 | 0.00 | 3.01     |
| bmilplib-310-1  | -117    | -117.0000 | 0.00 | 4.64     |
| bmilplib-310-2  | -105    | -105.0000 | 0.00 | 9.74     |
| bmilplib-310-3  | -128    | -127.5231 | 0.00 | 11.07    |
| bmilplib-310-4  | -148    | -147.7826 | 0.00 | 13.77    |
| bmilplib-310-5  | -161    | -161.4500 | 0.00 | 7.20     |
| bmilplib-310-6  | -141    | -141.1798 | 0.00 | 16.29    |
| bmilplib-310-7  | -142    | -142.0000 | 0.00 | 15.23    |
| bmilplib-310-8  | -115    | -115.3431 | 0.00 | 7.99     |
| bmilplib-310-9  | -116    | -115.6491 | 0.00 | 4.70     |
| bmilplib-360-10 | -109    | -108.5926 | 0.00 | 14.02    |
| bmilplib-360-1  | -133    | -133.0000 | 0.00 | 16.69    |
| bmilplib-360-2  | -138    | -138.4349 | 0.00 | 28.24    |
| bmilplib-360-3  | -131    | -131.0000 | 0.00 | 11.17    |
| bmilplib-360-4  | -119    | -119.0000 | 0.00 | 13.06    |
| bmilplib-360-5  | -164    | -164.2566 | 0.00 | 11.00    |
| bmilplib-360-6  | -110    | -110.1242 | 0.00 | 15.08    |
| bmilplib-360-7  | -105    | -105.0000 | 0.00 | 7.12     |
| bmilplib-360-8  | -98     | -98.2500  | 0.00 | 18.51    |
| bmilplib-360-9  | -127    | -127.2222 | 0.00 | 8.98     |
| bmilplib-410-10 | -153    | -153.3671 | 0.00 | 41.62    |
| bmilplib-410-1  | -104    | -103.5043 | 0.00 | 19.31    |
| bmilplib-410-2  | -109    | -108.5953 | 0.00 | 10.48    |
| bmilplib-410-3  | -96     | -96.2377  | 0.00 | 29.41    |
| bmilplib-410-4  | -120    | -119.5000 | 0.00 | 8.25     |
| bmilplib-410-5  | -119    | -119.2188 | 0.00 | 20.97    |
| bmilplib-410-6  | -151    | -151.3077 | 0.00 | 9.99     |
| bmilplib-410-7  | -123    | -123.0000 | 0.00 | 8.77     |
| bmilplib-410-8  | -126    | -125.7837 | 0.00 | 14.86    |
| bmilplib-410-9  | -101    | -100.7683 | 0.00 | 23.37    |
| bmilplib-460-10 | -103    | -102.5143 | 0.00 | 22.50    |
| bmilplib-460-1  | -98     | -97.5882  | 0.00 | 21.72    |
| bmilplib-460-2  | -139    | -139.0000 | 0.00 | 9.70     |
| bmilplib-460-3  | -87     | -86.5021  | 0.00 | 22.22    |
| bmilplib-460-4  | -107    | -107.0305 | 0.00 | 34.94    |
| bmilplib-460-5  | -100    | -100.4955 | 0.00 | 21.39    |
| bmilplib-460-6  | -107    | -107.0000 | 0.00 | 20.99    |

Table 3 – continued from previous page

| instance       | BestSol | LB        | %gap | time [s] |
|----------------|---------|-----------|------|----------|
| bmilplib-460-7 | -84     | -83.7500  | 0.00 | 32.20    |
| bmilplib-460-8 | -115    | -115.3878 | 0.00 | 22.08    |
| bmilplib-460-9 | -129    | -128.7011 | 0.00 | 23.42    |
| bmilplib-60-10 | -186    | -186.2051 | 0.00 | 1.61     |
| bmilplib-60-1  | -153    | -153.1966 | 0.00 | 1.61     |
| bmilplib-60-2  | -145    | -144.6667 | 0.00 | 0.45     |
| bmilplib-60-3  | -251    | -251.4429 | 0.00 | 0.48     |
| bmilplib-60-4  | -221    | -221.2500 | 0.00 | 0.68     |
| bmilplib-60-5  | -116    | -116.4000 | 0.00 | 0.53     |
| bmilplib-60-6  | -187    | -187.3077 | 0.00 | 0.66     |
| bmilplib-60-7  | -182    | -181.7200 | 0.00 | 0.65     |
| bmilplib-60-8  | -232    | -232.1212 | 0.00 | 0.80     |
| bmilplib-60-9  | -136    | -136.5000 | 0.00 | 1.73     |

# Instance Set INTER-KP

The instances are available at <http://coral.ise.lehigh.edu/data-sets/bilevel-instances/detailed-bilevel-instances-mcdm/>.

Table 4: Results for instance set INTER-KP.

| instance | BestSol | LB        | %gap  | time [s] |
|----------|---------|-----------|-------|----------|
| K5010W01 | 1401    | 1401.0000 | 0.00  | 0.43     |
| K5010W02 | 1060    | 1060.0000 | 0.00  | 0.40     |
| K5010W03 | 526     | 526.0000  | 0.00  | 0.31     |
| K5010W04 | 1533    | 1533.0000 | 0.00  | 0.34     |
| K5010W05 | 2114    | 2114.0000 | 0.00  | 0.34     |
| K5010W06 | 1100    | 1100.0000 | 0.00  | 0.44     |
| K5010W07 | 1135    | 1135.0000 | 0.00  | 0.37     |
| K5010W08 | 1707    | 1707.0000 | 0.00  | 0.37     |
| K5010W09 | 271     | 271.0000  | 0.00  | 0.36     |
| K5010W10 | 509     | 509.0000  | 0.00  | 0.40     |
| K5010W11 | 1759    | 1759.0000 | 0.00  | 0.42     |
| K5010W12 | 1223    | 1223.0000 | 0.00  | 0.39     |
| K5010W13 | 700     | 700.0000  | 0.00  | 0.32     |
| K5010W14 | 644     | 644.0000  | 0.00  | 0.34     |
| K5010W15 | 1723    | 1723.0000 | 0.00  | 0.36     |
| K5010W16 | 1098    | 1098.0000 | 0.00  | 0.35     |
| K5010W17 | 1465    | 1465.0000 | 0.00  | 0.31     |
| K5010W18 | 1580    | 1580.0000 | 0.00  | 0.35     |
| K5010W19 | 2055    | 2055.0000 | 0.00  | 0.43     |
| K5010W20 | 1998    | 1998.0000 | 0.00  | 0.25     |
| K5020W01 | 2379    | 2379.0000 | 0.00  | 2.55     |
| K5020W02 | 2785    | 2785.0000 | 0.00  | 2.70     |
| K5020W03 | 1550    | 1550.0000 | 0.00  | 0.64     |
| K5020W04 | 2131    | 2131.0000 | 0.00  | 1.98     |
| K5020W05 | 3212    | 3212.0000 | 0.00  | 4.90     |
| K5020W06 | 1245    | 1245.0000 | 0.00  | 0.90     |
| K5020W07 | 1432    | 1432.0000 | 0.00  | 0.84     |
| K5020W08 | 3117    | 3117.0000 | 0.00  | 8.82     |
| K5020W09 | 1177    | 1177.0000 | 0.00  | 0.91     |
| K5020W10 | 2098    | 2098.0000 | 0.00  | 1.67     |
| K5020W11 | 1804    | 1804.0000 | 0.00  | 2.42     |
| K5020W12 | 2086    | 2086.0000 | 0.00  | 0.76     |
| K5020W13 | 2194    | 2194.0000 | 0.00  | 1.17     |
| K5020W14 | 1999    | 1999.0000 | 0.00  | 1.65     |
| K5020W15 | 1793    | 1793.0000 | 0.00  | 0.91     |
| K5020W16 | 1776    | 1776.0000 | 0.00  | 1.31     |
| K5020W17 | 2767    | 2767.0000 | 0.00  | 1.87     |
| K5020W18 | 2021    | 2021.0000 | 0.00  | 1.38     |
| K5020W19 | 4124    | 4124.0000 | 0.00  | 11.71    |
| K5020W20 | 1949    | 1949.0000 | 0.00  | 0.67     |
| K5030W01 | 2956    | 2956.0000 | 0.00  | 39.88    |
| K5030W02 | 3529    | 3529.0000 | 0.00  | 86.77    |
| K5030W03 | 2706    | 2706.0000 | 0.00  | 43.01    |
| K5030W04 | 3201    | 3201.0000 | 0.00  | 73.32    |
| K5030W05 | 4861    | 4861.0000 | 0.00  | 569.09   |
| K5030W06 | 1997    | 1997.0000 | 0.00  | 12.12    |
| K5030W07 | 2270    | 2270.0000 | 0.00  | 18.99    |
| K5030W08 | 4902    | 4902.0000 | 0.00  | 1077.40  |
| K5030W09 | 2201    | 2201.0000 | 0.00  | 14.06    |
| K5030W10 | 2668    | 2668.0000 | 0.00  | 19.00    |
| K5030W11 | 2013    | 2013.0000 | 0.00  | 28.67    |
| K5030W12 | 2534    | 2534.0000 | 0.00  | 11.42    |
| K5030W13 | 3152    | 3152.0000 | 0.00  | 21.57    |
| K5030W14 | 2184    | 2184.0000 | 0.00  | 23.05    |
| K5030W15 | 2841    | 2841.0000 | 0.00  | 53.60    |
| K5030W16 | 2102    | 2102.0000 | 0.00  | 12.57    |
| K5030W17 | 3553    | 3553.0000 | 0.00  | 98.74    |
| K5030W18 | 2602    | 2602.0000 | 0.00  | 19.66    |
| K5030W19 | 5015    | 5015.0000 | 0.00  | 710.57   |
| K5030W20 | 2496    | 2496.0000 | 0.00  | 11.95    |
| K5040W01 | 4254    | 3204.0000 | 24.68 | 3600.00  |
| K5040W02 | 4423    | 4423.0000 | 0.00  | 2533.36  |
| K5040W03 | 3440    | 3440.0000 | 0.00  | 1578.91  |
| K5040W04 | 3574    | 3574.0000 | 0.00  | 1158.20  |
| K5040W05 | 4646    | 3363.6302 | 27.60 | 3600.00  |
| K5040W06 | 2606    | 2606.0000 | 0.00  | 233.58   |

Table 4 – continued from previous page

| instance  | BestSol | LB        | %gap  | time [s] |
|-----------|---------|-----------|-------|----------|
| K5040W07  | 3244    | 3244.0000 | 0.00  | 600.63   |
| K5040W08  | 6345    | 2870.0000 | 54.77 | 3600.00  |
| K5040W09  | 3154    | 3154.0000 | 0.00  | 410.00   |
| K5040W10  | 4382    | 4382.0000 | 0.00  | 3099.20  |
| K5040W11  | 3389    | 3389.0000 | 0.00  | 1120.76  |
| K5040W12  | 3817    | 3817.0000 | 0.00  | 593.61   |
| K5040W13  | 4174    | 4174.0000 | 0.00  | 1126.49  |
| K5040W14  | 3374    | 3374.0000 | 0.00  | 1090.91  |
| K5040W15  | 3925    | 3164.8373 | 19.37 | 3600.00  |
| K5040W16  | 2605    | 2605.0000 | 0.00  | 194.39   |
| K5040W17  | 3996    | 3996.0000 | 0.00  | 2645.77  |
| K5040W18  | 3342    | 3342.0000 | 0.00  | 918.78   |
| K5040W19  | 5299    | 3167.0000 | 40.23 | 3600.00  |
| K5040W20  | 2875    | 2875.0000 | 0.00  | 267.87   |
| K5050W01  | 4244    | 2610.2294 | 38.50 | 3600.00  |
| K5050W02  | 5280    | 2559.0000 | 51.53 | 3600.00  |
| K5050W03  | 5483    | 2530.0283 | 53.86 | 3600.00  |
| K5050W04  | 3999    | 2401.0000 | 39.96 | 3600.00  |
| K5050W05  | 5109    | 2408.0000 | 52.87 | 3600.00  |
| K5050W06  | 3558    | 2691.9300 | 24.34 | 3600.00  |
| K5050W07  | 4521    | 2355.0000 | 47.91 | 3600.00  |
| K5050W08  | 8215    | 2706.5175 | 67.05 | 3600.00  |
| K5050W09  | 4775    | 2521.0000 | 47.20 | 3600.00  |
| K5050W10  | 5575    | 2682.1036 | 51.89 | 3600.00  |
| K5050W11  | 3855    | 2287.0000 | 40.67 | 3600.00  |
| K5050W12  | 4885    | 2738.0731 | 43.95 | 3600.00  |
| K5050W13  | 4926    | 2816.0000 | 42.83 | 3600.00  |
| K5050W14  | 5055    | 2249.0000 | 55.51 | 3600.00  |
| K5050W15  | 4757    | 2240.7014 | 52.90 | 3600.00  |
| K5050W16  | 4039    | 2222.0000 | 44.99 | 3600.00  |
| K5050W17  | 5666    | 2672.0930 | 52.84 | 3600.00  |
| K5050W18  | 4591    | 2858.0000 | 37.75 | 3600.00  |
| K5050W19  | 6022    | 2717.5260 | 54.87 | 3600.00  |
| K5050W20  | 4303    | 2247.0000 | 47.78 | 3600.00  |
| nK5010W01 | 977     | 977.0000  | 0.00  | 0.15     |
| nK5010W02 | 2260    | 2260.0000 | 0.00  | 0.10     |
| nK5010W03 | 1231    | 1231.0000 | 0.00  | 0.06     |
| nK5010W04 | 1590    | 1590.0000 | 0.00  | 0.10     |
| nK5010W05 | 1476    | 1476.0000 | 0.00  | 0.11     |
| nK5010W06 | 936     | 936.0000  | 0.00  | 0.11     |
| nK5010W07 | 1668    | 1668.0000 | 0.00  | 0.13     |
| nK5010W08 | 1771    | 1771.0000 | 0.00  | 0.14     |
| nK5010W09 | 820     | 820.0000  | 0.00  | 0.06     |
| nK5010W10 | 1065    | 1065.0000 | 0.00  | 0.09     |
| nK5010W11 | 425     | 425.0000  | 0.00  | 0.08     |
| nK5010W12 | 773     | 773.0000  | 0.00  | 0.10     |
| nK5010W13 | 760     | 760.0000  | 0.00  | 0.14     |
| nK5010W14 | 1260    | 1260.0000 | 0.00  | 0.10     |
| nK5010W15 | 730     | 730.0000  | 0.00  | 0.09     |
| nK5010W16 | 1712    | 1712.0000 | 0.00  | 0.10     |
| nK5010W17 | 1761    | 1761.0000 | 0.00  | 0.07     |
| nK5010W18 | 905     | 905.0000  | 0.00  | 0.13     |
| nK5010W19 | 1568    | 1568.0000 | 0.00  | 0.10     |
| nK5010W20 | 939     | 939.0000  | 0.00  | 0.10     |
| nK5011W01 | 1007    | 1007.0000 | 0.00  | 0.14     |
| nK5011W02 | 2198    | 2198.0000 | 0.00  | 0.10     |
| nK5011W03 | 1762    | 1762.0000 | 0.00  | 0.11     |
| nK5011W04 | 1475    | 1475.0000 | 0.00  | 0.08     |
| nK5011W05 | 795     | 795.0000  | 0.00  | 0.13     |
| nK5011W06 | 678     | 678.0000  | 0.00  | 0.10     |
| nK5011W07 | 1403    | 1403.0000 | 0.00  | 0.14     |
| nK5011W08 | 1803    | 1803.0000 | 0.00  | 0.13     |
| nK5011W09 | 926     | 926.0000  | 0.00  | 0.08     |
| nK5011W10 | 1855    | 1855.0000 | 0.00  | 0.12     |
| nK5011W11 | 1161    | 1161.0000 | 0.00  | 0.11     |
| nK5011W12 | 973     | 973.0000  | 0.00  | 0.12     |
| nK5011W13 | 893     | 893.0000  | 0.00  | 0.06     |
| nK5011W14 | 1492    | 1492.0000 | 0.00  | 0.10     |
| nK5011W15 | 1060    | 1060.0000 | 0.00  | 0.13     |
| nK5011W16 | 2182    | 2182.0000 | 0.00  | 0.13     |
| nK5011W17 | 633     | 633.0000  | 0.00  | 0.09     |
| nK5011W18 | 1220    | 1220.0000 | 0.00  | 0.12     |
| nK5011W19 | 2575    | 2575.0000 | 0.00  | 0.15     |
| nK5011W20 | 1325    | 1325.0000 | 0.00  | 0.14     |

Table 4 – continued from previous page

| instance  | BestSol | LB        | %gap | time [s] |
|-----------|---------|-----------|------|----------|
| nK5012W01 | 2317    | 2317.0000 | 0.00 | 0.16     |
| nK5012W02 | 1169    | 1169.0000 | 0.00 | 0.18     |
| nK5012W03 | 1506    | 1506.0000 | 0.00 | 0.13     |
| nK5012W04 | 935     | 935.0000  | 0.00 | 0.20     |
| nK5012W05 | 1421    | 1421.0000 | 0.00 | 0.17     |
| nK5012W06 | 628     | 628.0000  | 0.00 | 0.08     |
| nK5012W07 | 1601    | 1601.0000 | 0.00 | 0.17     |
| nK5012W08 | 1850    | 1850.0000 | 0.00 | 0.18     |
| nK5012W09 | 1236    | 1236.0000 | 0.00 | 0.17     |
| nK5012W10 | 1224    | 1224.0000 | 0.00 | 0.07     |
| nK5012W11 | 602     | 602.0000  | 0.00 | 0.07     |
| nK5012W12 | 1743    | 1743.0000 | 0.00 | 0.16     |
| nK5012W13 | 1847    | 1847.0000 | 0.00 | 0.19     |
| nK5012W14 | 2188    | 2188.0000 | 0.00 | 0.17     |
| nK5012W15 | 812     | 812.0000  | 0.00 | 0.12     |
| nK5012W16 | 2197    | 2197.0000 | 0.00 | 0.16     |
| nK5012W17 | 2275    | 2275.0000 | 0.00 | 0.14     |
| nK5012W18 | 1097    | 1097.0000 | 0.00 | 0.08     |
| nK5012W19 | 753     | 753.0000  | 0.00 | 0.15     |
| nK5012W20 | 1412    | 1412.0000 | 0.00 | 0.12     |

# Instance Set INTER-KP2

The instances are available at [http://people.clemson.edu/7Ejcsmith/Test\\_Instances\\_files/BKPIns.zip](http://people.clemson.edu/7Ejcsmith/Test_Instances_files/BKPIns.zip).

Table 5: Results for instance set INTER-KP2.

| instance        | BestSol | LB        | %gap | time [s] |
|-----------------|---------|-----------|------|----------|
| BKPIns-15-12-10 | 24      | 24.0000   | 0.00 | 0.05     |
| BKPIns-15-12-1  | 5       | 5.0000    | 0.00 | 0.04     |
| BKPIns-15-12-2  | 23      | 23.0000   | 0.00 | 0.04     |
| BKPIns-15-12-3  | 17      | 17.0000   | 0.00 | 0.05     |
| BKPIns-15-12-4  | 44      | 44.0000   | 0.00 | 0.04     |
| BKPIns-15-12-5  | 30      | 30.0000   | 0.00 | 0.06     |
| BKPIns-15-12-6  | 8       | 8.0000    | 0.00 | 0.07     |
| BKPIns-15-12-7  | 12      | 12.0000   | 0.00 | 0.07     |
| BKPIns-15-12-8  | 31      | 31.0000   | 0.00 | 0.04     |
| BKPIns-15-12-9  | 17      | 17.0000   | 0.00 | 0.06     |
| BKPIns-15-4-10  | 270     | 270.0000  | 0.00 | 0.56     |
| BKPIns-15-4-1   | 194     | 194.0000  | 0.00 | 0.58     |
| BKPIns-15-4-2   | 217     | 217.0000  | 0.00 | 0.52     |
| BKPIns-15-4-3   | 184     | 184.0000  | 0.00 | 0.66     |
| BKPIns-15-4-4   | 344     | 344.0000  | 0.00 | 1.04     |
| BKPIns-15-4-5   | 291     | 291.0000  | 0.00 | 0.82     |
| BKPIns-15-4-6   | 301     | 301.0000  | 0.00 | 0.82     |
| BKPIns-15-4-7   | 247     | 247.0000  | 0.00 | 0.65     |
| BKPIns-15-4-8   | 348     | 348.0000  | 0.00 | 0.72     |
| BKPIns-15-4-9   | 248     | 248.0000  | 0.00 | 0.61     |
| BKPIns-15-8-10  | 97      | 97.0000   | 0.00 | 0.26     |
| BKPIns-15-8-1   | 71      | 71.0000   | 0.00 | 0.22     |
| BKPIns-15-8-2   | 84      | 84.0000   | 0.00 | 0.30     |
| BKPIns-15-8-3   | 66      | 66.0000   | 0.00 | 0.27     |
| BKPIns-15-8-4   | 150     | 150.0000  | 0.00 | 0.35     |
| BKPIns-15-8-5   | 117     | 117.0000  | 0.00 | 0.27     |
| BKPIns-15-8-6   | 89      | 89.0000   | 0.00 | 0.26     |
| BKPIns-15-8-7   | 95      | 95.0000   | 0.00 | 0.23     |
| BKPIns-15-8-8   | 149     | 149.0000  | 0.00 | 0.39     |
| BKPIns-15-8-9   | 100     | -100.0000 | 0.00 | 0.32     |
| BKPIns-18-14-10 | 22      | 22.0000   | 0.00 | 0.08     |
| BKPIns-18-14-1  | 24      | 24.0000   | 0.00 | 0.13     |
| BKPIns-18-14-2  | 19      | 19.0000   | 0.00 | 0.12     |
| BKPIns-18-14-3  | 41      | 41.0000   | 0.00 | 0.08     |
| BKPIns-18-14-4  | 38      | 38.0000   | 0.00 | 0.06     |
| BKPIns-18-14-5  | 33      | 33.0000   | 0.00 | 0.12     |
| BKPIns-18-14-6  | 50      | 50.0000   | 0.00 | 0.08     |
| BKPIns-18-14-7  | 7       | 7.0000    | 0.00 | 0.08     |
| BKPIns-18-14-8  | 30      | 30.0000   | 0.00 | 0.12     |
| BKPIns-18-14-9  | 46      | 46.0000   | 0.00 | 0.10     |
| BKPIns-18-5-10  | 305     | 305.0000  | 0.00 | 1.51     |
| BKPIns-18-5-14  | 272     | 272.0000  | 0.00 | 2.12     |
| BKPIns-18-5-1   | 272     | 272.0000  | 0.00 | 2.08     |
| BKPIns-18-5-2   | 283     | 283.0000  | 0.00 | 1.05     |
| BKPIns-18-5-3   | 211     | 211.0000  | 0.00 | 2.72     |
| BKPIns-18-5-4   | 380     | 380.0000  | 0.00 | 3.28     |
| BKPIns-18-5-5   | 299     | 299.0000  | 0.00 | 2.34     |
| BKPIns-18-5-6   | 337     | 337.0000  | 0.00 | 2.00     |
| BKPIns-18-5-7   | 265     | 265.0000  | 0.00 | 1.46     |
| BKPIns-18-5-8   | 345     | 345.0000  | 0.00 | 1.50     |
| BKPIns-18-5-9   | 338     | 338.0000  | 0.00 | 2.03     |
| BKPIns-18-9-10  | 142     | 142.0000  | 0.00 | 0.77     |
| BKPIns-18-9-1   | 107     | 107.0000  | 0.00 | 0.64     |
| BKPIns-18-9-2   | 93      | 93.0000   | 0.00 | 0.51     |
| BKPIns-18-9-3   | 116     | 116.0000  | 0.00 | 1.19     |
| BKPIns-18-9-4   | 209     | 209.0000  | 0.00 | 1.29     |
| BKPIns-18-9-5   | 160     | 160.0000  | 0.00 | 1.05     |
| BKPIns-18-9-6   | 128     | 128.0000  | 0.00 | 0.70     |
| BKPIns-18-9-7   | 128     | 128.0000  | 0.00 | 0.71     |
| BKPIns-18-9-8   | 186     | 186.0000  | 0.00 | 1.00     |
| BKPIns-18-9-9   | 165     | 165.0000  | 0.00 | 1.23     |
| BKPIns-20-10-10 | 172     | 172.0000  | 0.00 | 1.67     |
| BKPIns-20-10-1  | 168     | 168.0000  | 0.00 | 4.35     |
| BKPIns-20-10-2  | 137     | 137.0000  | 0.00 | 0.87     |
| BKPIns-20-10-3  | 131     | 131.0000  | 0.00 | 1.40     |
| BKPIns-20-10-4  | 187     | 187.0000  | 0.00 | 1.09     |

Table 5 – continued from previous page

| instance         | BestSol | LB       | %gap | time [s] |
|------------------|---------|----------|------|----------|
| BKPIIns-20-10-5  | 217     | 217.0000 | 0.00 | 3.04     |
| BKPIIns-20-10-6  | 131     | 131.0000 | 0.00 | 0.86     |
| BKPIIns-20-10-7  | 115     | 115.0000 | 0.00 | 0.66     |
| BKPIIns-20-10-8  | 209     | 209.0000 | 0.00 | 1.38     |
| BKPIIns-20-10-9  | 170     | 170.0000 | 0.00 | 1.89     |
| BKPIIns-20-15-10 | 43      | 43.0000  | 0.00 | 0.27     |
| BKPIIns-20-15-1  | 42      | 42.0000  | 0.00 | 0.38     |
| BKPIIns-20-15-2  | 23      | 23.0000  | 0.00 | 0.20     |
| BKPIIns-20-15-3  | 24      | 24.0000  | 0.00 | 0.14     |
| BKPIIns-20-15-4  | 32      | 32.0000  | 0.00 | 0.18     |
| BKPIIns-20-15-5  | 57      | 57.0000  | 0.00 | 0.12     |
| BKPIIns-20-15-6  | 26      | 26.0000  | 0.00 | 0.17     |
| BKPIIns-20-15-7  | 7       | 7.0000   | 0.00 | 0.10     |
| BKPIIns-20-15-8  | 30      | 30.0000  | 0.00 | 0.11     |
| BKPIIns-20-15-9  | 30      | 30.0000  | 0.00 | 0.18     |
| BKPIIns-20-5-10  | 384     | 384.0000 | 0.00 | 5.02     |
| BKPIIns-20-5-1   | 323     | 323.0000 | 0.00 | 7.92     |
| BKPIIns-20-5-2   | 347     | 347.0000 | 0.00 | 2.69     |
| BKPIIns-20-5-3   | 336     | 336.0000 | 0.00 | 6.26     |
| BKPIIns-20-5-4   | 474     | 474.0000 | 0.00 | 5.23     |
| BKPIIns-20-5-5   | 434     | 434.0000 | 0.00 | 8.60     |
| BKPIIns-20-5-6   | 363     | 363.0000 | 0.00 | 3.52     |
| BKPIIns-20-5-7   | 335     | 335.0000 | 0.00 | 2.50     |
| BKPIIns-20-5-8   | 477     | 477.0000 | 0.00 | 7.20     |
| BKPIIns-20-5-9   | 412     | 412.0000 | 0.00 | 4.82     |
| BKPIIns-22-11-10 | 160     | 160.0000 | 0.00 | 2.03     |
| BKPIIns-22-11-1  | 160     | 160.0000 | 0.00 | 2.35     |
| BKPIIns-22-11-2  | 144     | 144.0000 | 0.00 | 0.86     |
| BKPIIns-22-11-3  | 122     | 122.0000 | 0.00 | 1.78     |
| BKPIIns-22-11-4  | 211     | 211.0000 | 0.00 | 3.09     |
| BKPIIns-22-11-5  | 219     | 219.0000 | 0.00 | 6.07     |
| BKPIIns-22-11-6  | 114     | 114.0000 | 0.00 | 1.73     |
| BKPIIns-22-11-7  | 143     | 143.0000 | 0.00 | 1.56     |
| BKPIIns-22-11-8  | 217     | 217.0000 | 0.00 | 2.44     |
| BKPIIns-22-11-9  | 120     | 120.0000 | 0.00 | 0.87     |
| BKPIIns-22-17-10 | 34      | 34.0000  | 0.00 | 0.20     |
| BKPIIns-22-17-1  | 23      | 23.0000  | 0.00 | 0.19     |
| BKPIIns-22-17-2  | 18      | 18.0000  | 0.00 | 0.09     |
| BKPIIns-22-17-3  | 28      | 28.0000  | 0.00 | 0.15     |
| BKPIIns-22-17-4  | 32      | 32.0000  | 0.00 | 0.14     |
| BKPIIns-22-17-5  | 59      | 59.0000  | 0.00 | 0.18     |
| BKPIIns-22-17-6  | 29      | 29.0000  | 0.00 | 0.21     |
| BKPIIns-22-17-7  | 12      | 12.0000  | 0.00 | 0.15     |
| BKPIIns-22-17-8  | 41      | 41.0000  | 0.00 | 0.10     |
| BKPIIns-22-17-9  | 16      | 16.0000  | 0.00 | 0.13     |
| BKPIIns-22-6-10  | 360     | 360.0000 | 0.00 | 6.43     |
| BKPIIns-22-6-1   | 345     | 345.0000 | 0.00 | 14.43    |
| BKPIIns-22-6-2   | 390     | 390.0000 | 0.00 | 4.59     |
| BKPIIns-22-6-3   | 278     | 278.0000 | 0.00 | 5.97     |
| BKPIIns-22-6-4   | 486     | 486.0000 | 0.00 | 15.91    |
| BKPIIns-22-6-5   | 443     | 443.0000 | 0.00 | 23.73    |
| BKPIIns-22-6-6   | 337     | 337.0000 | 0.00 | 6.26     |
| BKPIIns-22-6-7   | 314     | 314.0000 | 0.00 | 4.03     |
| BKPIIns-22-6-8   | 503     | 503.0000 | 0.00 | 16.39    |
| BKPIIns-22-6-9   | 371     | 371.0000 | 0.00 | 5.04     |
| BKPIIns-25-13-10 | 257     | 257.0000 | 0.00 | 15.95    |
| BKPIIns-25-13-1  | 183     | 183.0000 | 0.00 | 17.27    |
| BKPIIns-25-13-2  | 146     | 146.0000 | 0.00 | 1.72     |
| BKPIIns-25-13-3  | 119     | 119.0000 | 0.00 | 3.18     |
| BKPIIns-25-13-4  | 227     | 227.0000 | 0.00 | 8.17     |
| BKPIIns-25-13-5  | 257     | 257.0000 | 0.00 | 16.35    |
| BKPIIns-25-13-6  | 133     | 133.0000 | 0.00 | 2.40     |
| BKPIIns-25-13-7  | 190     | 190.0000 | 0.00 | 6.07     |
| BKPIIns-25-13-8  | 229     | 229.0000 | 0.00 | 5.72     |
| BKPIIns-25-13-9  | 174     | 174.0000 | 0.00 | 3.57     |
| BKPIIns-25-19-10 | 63      | 63.0000  | 0.00 | 0.51     |
| BKPIIns-25-19-1  | 45      | 45.0000  | 0.00 | 0.35     |
| BKPIIns-25-19-2  | 23      | 23.0000  | 0.00 | 0.23     |
| BKPIIns-25-19-3  | 27      | 27.0000  | 0.00 | 0.62     |
| BKPIIns-25-19-4  | 59      | 59.0000  | 0.00 | 0.59     |
| BKPIIns-25-19-5  | 65      | 65.0000  | 0.00 | 0.27     |
| BKPIIns-25-19-6  | 27      | 27.0000  | 0.00 | 0.26     |
| BKPIIns-25-19-7  | 17      | 17.0000  | 0.00 | 0.29     |
| BKPIIns-25-19-8  | 56      | 56.0000  | 0.00 | 0.32     |

Table 5 – continued from previous page

| instance         | BestSol | LB       | %gap | time [s] |
|------------------|---------|----------|------|----------|
| BKPIIns-25-19-9  | 36      | 36.0000  | 0.00 | 0.36     |
| BKPIIns-25-7-10  | 524     | 524.0000 | 0.00 | 56.68    |
| BKPIIns-25-7-1   | 351     | 351.0000 | 0.00 | 40.74    |
| BKPIIns-25-7-2   | 449     | 449.0000 | 0.00 | 21.63    |
| BKPIIns-25-7-3   | 321     | 321.0000 | 0.00 | 25.53    |
| BKPIIns-25-7-4   | 458     | 458.0000 | 0.00 | 29.49    |
| BKPIIns-25-7-5   | 521     | 521.0000 | 0.00 | 49.51    |
| BKPIIns-25-7-6   | 356     | 356.0000 | 0.00 | 19.05    |
| BKPIIns-25-7-7   | 418     | 418.0000 | 0.00 | 27.44    |
| BKPIIns-25-7-8   | 510     | 510.0000 | 0.00 | 38.21    |
| BKPIIns-25-7-9   | 454     | 454.0000 | 0.00 | 27.89    |
| BKPIIns-28-14-10 | 260     | 260.0000 | 0.00 | 32.37    |
| BKPIIns-28-14-1  | 188     | 188.0000 | 0.00 | 24.17    |
| BKPIIns-28-14-2  | 196     | 196.0000 | 0.00 | 6.31     |
| BKPIIns-28-14-3  | 182     | 182.0000 | 0.00 | 22.30    |
| BKPIIns-28-14-4  | 259     | 259.0000 | 0.00 | 28.71    |
| BKPIIns-28-14-5  | 285     | 285.0000 | 0.00 | 35.80    |
| BKPIIns-28-14-6  | 156     | 156.0000 | 0.00 | 4.63     |
| BKPIIns-28-14-7  | 204     | 204.0000 | 0.00 | 13.89    |
| BKPIIns-28-14-8  | 310     | 310.0000 | 0.00 | 48.80    |
| BKPIIns-28-14-9  | 194     | 194.0000 | 0.00 | 9.34     |
| BKPIIns-28-21-10 | 50      | 50.0000  | 0.00 | 0.43     |
| BKPIIns-28-21-1  | 37      | 37.0000  | 0.00 | 0.36     |
| BKPIIns-28-21-2  | 44      | 44.0000  | 0.00 | 0.41     |
| BKPIIns-28-21-3  | 35      | 35.0000  | 0.00 | 0.53     |
| BKPIIns-28-21-4  | 74      | 74.0000  | 0.00 | 0.61     |
| BKPIIns-28-21-5  | 58      | 58.0000  | 0.00 | 0.62     |
| BKPIIns-28-21-6  | 35      | 35.0000  | 0.00 | 0.42     |
| BKPIIns-28-21-7  | 26      | 26.0000  | 0.00 | 0.32     |
| BKPIIns-28-21-8  | 54      | 54.0000  | 0.00 | 0.43     |
| BKPIIns-28-21-9  | 49      | 49.0000  | 0.00 | 0.94     |
| BKPIIns-28-7-10  | 573     | 573.0000 | 0.00 | 111.74   |
| BKPIIns-28-7-1   | 378     | 378.0000 | 0.00 | 55.99    |
| BKPIIns-28-7-2   | 549     | 549.0000 | 0.00 | 87.24    |
| BKPIIns-28-7-3   | 388     | 388.0000 | 0.00 | 67.84    |
| BKPIIns-28-7-4   | 566     | 566.0000 | 0.00 | 81.88    |
| BKPIIns-28-7-5   | 603     | 603.0000 | 0.00 | 144.08   |
| BKPIIns-28-7-6   | 439     | 439.0000 | 0.00 | 32.39    |
| BKPIIns-28-7-7   | 509     | 509.0000 | 0.00 | 88.08    |
| BKPIIns-28-7-8   | 647     | 647.0000 | 0.00 | 223.88   |
| BKPIIns-28-7-9   | 509     | 509.0000 | 0.00 | 86.29    |
| BKPIIns-30-15-10 | 249     | 249.0000 | 0.00 | 39.14    |
| BKPIIns-30-15-1  | 210     | 210.0000 | 0.00 | 45.48    |
| BKPIIns-30-15-2  | 207     | 207.0000 | 0.00 | 17.48    |
| BKPIIns-30-15-3  | 190     | 190.0000 | 0.00 | 28.55    |
| BKPIIns-30-15-4  | 310     | 310.0000 | 0.00 | 70.63    |
| BKPIIns-30-15-5  | 277     | 277.0000 | 0.00 | 50.61    |
| BKPIIns-30-15-6  | 201     | 201.0000 | 0.00 | 16.68    |
| BKPIIns-30-15-7  | 206     | 206.0000 | 0.00 | 13.90    |
| BKPIIns-30-15-8  | 263     | 263.0000 | 0.00 | 22.02    |
| BKPIIns-30-15-9  | 187     | 187.0000 | 0.00 | 13.51    |
| BKPIIns-30-23-10 | 64      | 64.0000  | 0.00 | 0.74     |
| BKPIIns-30-23-1  | 41      | 41.0000  | 0.00 | 0.65     |
| BKPIIns-30-23-2  | 40      | 40.0000  | 0.00 | 0.44     |
| BKPIIns-30-23-3  | 44      | 44.0000  | 0.00 | 0.70     |
| BKPIIns-30-23-4  | 62      | 62.0000  | 0.00 | 0.60     |
| BKPIIns-30-23-5  | 66      | 66.0000  | 0.00 | 0.92     |
| BKPIIns-30-23-6  | 35      | 35.0000  | 0.00 | 0.55     |
| BKPIIns-30-23-7  | 25      | 25.0000  | 0.00 | 0.50     |
| BKPIIns-30-23-8  | 67      | 67.0000  | 0.00 | 0.58     |
| BKPIIns-30-23-9  | 31      | 31.0000  | 0.00 | 0.49     |
| BKPIIns-30-8-10  | 554     | 554.0000 | 0.00 | 362.38   |
| BKPIIns-30-8-1   | 445     | 445.0000 | 0.00 | 239.81   |
| BKPIIns-30-8-2   | 565     | 565.0000 | 0.00 | 225.23   |
| BKPIIns-30-8-3   | 428     | 428.0000 | 0.00 | 180.97   |
| BKPIIns-30-8-4   | 641     | 641.0000 | 0.00 | 542.76   |
| BKPIIns-30-8-5   | 566     | 566.0000 | 0.00 | 291.65   |
| BKPIIns-30-8-6   | 463     | 463.0000 | 0.00 | 138.78   |
| BKPIIns-30-8-7   | 575     | 575.0000 | 0.00 | 520.10   |
| BKPIIns-30-8-8   | 616     | 616.0000 | 0.00 | 306.84   |
| BKPIIns-30-8-9   | 510     | 510.0000 | 0.00 | 221.28   |

## Instance Set INTER-ASSIG

The instances are available at <http://coral.ise.lehigh.edu/data-sets/bilevel-instances/detailed-bilevel-instances-assignment/>.

Table 6: Results for instance set INTER-ASSIG.

| instance | BestSol | LB       | %gap | time [s] |
|----------|---------|----------|------|----------|
| 2AP05-10 | -46     | -46.0000 | 0.00 | 0.89     |
| 2AP05-11 | -36     | -36.0000 | 0.00 | 0.78     |
| 2AP05-12 | -49     | -49.0000 | 0.00 | 0.83     |
| 2AP05-13 | -44     | -44.0000 | 0.00 | 0.92     |
| 2AP05-14 | -48     | -48.0000 | 0.00 | 0.62     |
| 2AP05-15 | -48     | -48.0000 | 0.00 | 0.78     |
| 2AP05-16 | -34     | -34.0000 | 0.00 | 0.80     |
| 2AP05-17 | -66     | -66.0000 | 0.00 | 0.89     |
| 2AP05-18 | -35     | -35.0000 | 0.00 | 0.89     |
| 2AP05-19 | -39     | -39.0000 | 0.00 | 0.88     |
| 2AP05-1  | -36     | -36.0000 | 0.00 | 0.74     |
| 2AP05-20 | -42     | -42.0000 | 0.00 | 0.75     |
| 2AP05-21 | -47     | -47.0000 | 0.00 | 0.60     |
| 2AP05-22 | -50     | -50.0000 | 0.00 | 0.73     |
| 2AP05-23 | -41     | -41.0000 | 0.00 | 0.83     |
| 2AP05-24 | -43     | -43.0000 | 0.00 | 0.51     |
| 2AP05-25 | -45     | -45.0000 | 0.00 | 0.69     |
| 2AP05-2  | -46     | -46.0000 | 0.00 | 0.73     |
| 2AP05-3  | -46     | -46.0000 | 0.00 | 0.78     |
| 2AP05-4  | -25     | -25.0000 | 0.00 | 0.78     |
| 2AP05-5  | -38     | -38.0000 | 0.00 | 0.73     |
| 2AP05-6  | -32     | -32.0000 | 0.00 | 0.37     |
| 2AP05-7  | -49     | -49.0000 | 0.00 | 0.43     |
| 2AP05-8  | -41     | -41.0000 | 0.00 | 0.40     |
| 2AP05-9  | -54     | -54.0000 | 0.00 | 0.56     |

# Instance Set INTER-RANDOM

The instances are available at <http://coral.ise.lehigh.edu/data-sets/bilevel-instances/detailed-bilevel-instances-mips-symmetric-vs-nonsymmetric/>.

Table 7: Results for instance set INTER-RANDOM.

| instance                  | BestSol | LB       | %gap | time [s] |
|---------------------------|---------|----------|------|----------|
| amiblp-10-10-50-0110-0-10 | 0       | 0.0000   | 0.00 | 0.01     |
| amiblp-10-10-50-0110-0-1  | 11      | 11.0000  | 0.00 | 0.02     |
| amiblp-10-10-50-0110-0-2  | 121     | 121.0000 | 0.00 | 0.10     |
| amiblp-10-10-50-0110-0-3  | 47      | 47.0000  | 0.00 | 0.04     |
| amiblp-10-10-50-0110-0-4  | 45      | 45.0000  | 0.00 | 0.08     |
| amiblp-10-10-50-0110-0-5  | 47      | 47.0000  | 0.00 | 0.05     |
| amiblp-10-10-50-0110-0-6  | 33      | 33.0000  | 0.00 | 0.03     |
| amiblp-10-10-50-0110-0-7  | 0       | 0.0000   | 0.00 | 0.01     |
| amiblp-10-10-50-0110-0-8  | 23      | 23.0000  | 0.00 | 0.06     |
| amiblp-10-10-50-0110-0-9  | 5       | 5.0000   | 0.00 | 0.01     |
| amiblp-15-10-50-0110-0-10 | 1       | 1.0000   | 0.00 | 0.01     |
| amiblp-15-10-50-0110-0-1  | 28      | 28.0000  | 0.00 | 0.02     |
| amiblp-15-10-50-0110-0-2  | 0       | 0.0000   | 0.00 | 0.01     |
| amiblp-15-10-50-0110-0-3  | 47      | 47.0000  | 0.00 | 0.09     |
| amiblp-15-10-50-0110-0-4  | 10      | 10.0000  | 0.00 | 0.01     |
| amiblp-15-10-50-0110-0-5  | 108     | 108.0000 | 0.00 | 0.09     |
| amiblp-15-10-50-0110-0-6  | 3       | 3.0000   | 0.00 | 0.02     |
| amiblp-15-10-50-0110-0-7  | 51      | 51.0000  | 0.00 | 0.08     |
| amiblp-15-10-50-0110-0-8  | 25      | 25.0000  | 0.00 | 0.01     |
| amiblp-15-10-50-0110-0-9  | 0       | 0.0000   | 0.00 | 0.01     |
| amiblp-20-20-50-0110-0-10 | 183     | 183.0000 | 0.00 | 0.22     |
| amiblp-20-20-50-0110-0-1  | 168     | 168.0000 | 0.00 | 0.42     |
| amiblp-20-20-50-0110-0-2  | 68      | 68.0000  | 0.00 | 0.09     |
| amiblp-20-20-50-0110-0-3  | 119     | 119.0000 | 0.00 | 0.46     |
| amiblp-20-20-50-0110-0-4  | 116     | 116.0000 | 0.00 | 0.16     |
| amiblp-20-20-50-0110-0-5  | 122     | 122.0000 | 0.00 | 0.27     |
| amiblp-20-20-50-0110-0-6  | 15      | 15.0000  | 0.00 | 0.02     |
| amiblp-20-20-50-0110-0-7  | 57      | 57.0000  | 0.00 | 0.12     |
| amiblp-20-20-50-0110-0-8  | 222     | 222.0000 | 0.00 | 0.55     |
| amiblp-20-20-50-0110-0-9  | 57      | 57.0000  | 0.00 | 0.16     |
| amiblp-25-20-50-0110-0-10 | 94      | 94.0000  | 0.00 | 0.15     |
| amiblp-25-20-50-0110-0-1  | 172     | 172.0000 | 0.00 | 0.29     |
| amiblp-25-20-50-0110-0-2  | 33      | 33.0000  | 0.00 | 0.03     |
| amiblp-25-20-50-0110-0-3  | 64      | 64.0000  | 0.00 | 0.08     |
| amiblp-25-20-50-0110-0-4  | 142     | 142.0000 | 0.00 | 0.16     |
| amiblp-25-20-50-0110-0-5  | 63      | 63.0000  | 0.00 | 0.08     |
| amiblp-25-20-50-0110-0-6  | 224     | 224.0000 | 0.00 | 0.56     |
| amiblp-25-20-50-0110-0-7  | 50      | 50.0000  | 0.00 | 0.20     |
| amiblp-25-20-50-0110-0-8  | 0       | 0.0000   | 0.00 | 0.01     |
| amiblp-25-20-50-0110-0-9  | 183     | 183.0000 | 0.00 | 0.44     |
| smiblp-10-10-50-0110-0-10 | 0       | 0.0000   | 0.00 | 0.01     |
| smiblp-10-10-50-0110-0-1  | 0       | 0.0000   | 0.00 | 0.01     |
| smiblp-10-10-50-0110-0-2  | 152     | 152.0000 | 0.00 | 0.14     |
| smiblp-10-10-50-0110-0-3  | 17      | 17.0000  | 0.00 | 0.02     |
| smiblp-10-10-50-0110-0-4  | 37      | 37.0000  | 0.00 | 0.05     |
| smiblp-10-10-50-0110-0-5  | 18      | 18.0000  | 0.00 | 0.02     |
| smiblp-10-10-50-0110-0-6  | 33      | 33.0000  | 0.00 | 0.03     |
| smiblp-10-10-50-0110-0-7  | 0       | 0.0000   | 0.00 | 0.01     |
| smiblp-10-10-50-0110-0-8  | 23      | 23.0000  | 0.00 | 0.03     |
| smiblp-10-10-50-0110-0-9  | 5       | 5.0000   | 0.00 | 0.01     |
| smiblp-15-10-50-0110-0-10 | 1       | 1.0000   | 0.00 | 0.01     |
| smiblp-15-10-50-0110-0-1  | 13      | 13.0000  | 0.00 | 0.01     |
| smiblp-15-10-50-0110-0-2  | 0       | 0.0000   | 0.00 | 0.01     |
| smiblp-15-10-50-0110-0-3  | 44      | 44.0000  | 0.00 | 0.04     |
| smiblp-15-10-50-0110-0-4  | 10      | 10.0000  | 0.00 | 0.01     |
| smiblp-15-10-50-0110-0-5  | 104     | 104.0000 | 0.00 | 0.06     |
| smiblp-15-10-50-0110-0-6  | 3       | 3.0000   | 0.00 | 0.02     |
| smiblp-15-10-50-0110-0-7  | 43      | 43.0000  | 0.00 | 0.09     |
| smiblp-15-10-50-0110-0-8  | 25      | 25.0000  | 0.00 | 0.01     |
| smiblp-15-10-50-0110-0-9  | 0       | 0.0000   | 0.00 | 0.01     |
| smiblp-20-20-50-0110-0-10 | 174     | 174.0000 | 0.00 | 0.26     |
| smiblp-20-20-50-0110-0-1  | 210     | 210.0000 | 0.00 | 0.62     |
| smiblp-20-20-50-0110-0-2  | 86      | 86.0000  | 0.00 | 0.15     |
| smiblp-20-20-50-0110-0-3  | 122     | 122.0000 | 0.00 | 0.58     |
| smiblp-20-20-50-0110-0-4  | 135     | 135.0000 | 0.00 | 0.26     |
| smiblp-20-20-50-0110-0-5  | 118     | 118.0000 | 0.00 | 0.30     |

Table 7 – continued from previous page

| instance                  | BestSol | LB  | %gap     | time [s] |      |
|---------------------------|---------|-----|----------|----------|------|
| smiblp-20-20-50-0110-0-6  |         | 25  | 25.0000  | 0.00     | 0.02 |
| smiblp-20-20-50-0110-0-7  |         | 76  | 76.0000  | 0.00     | 0.20 |
| smiblp-20-20-50-0110-0-8  |         | 247 | 247.0000 | 0.00     | 1.08 |
| smiblp-20-20-50-0110-0-9  |         | 80  | 80.0000  | 0.00     | 0.30 |
| smiblp-25-20-50-0110-0-10 |         | 61  | 61.0000  | 0.00     | 0.25 |
| smiblp-25-20-50-0110-0-1  |         | 138 | 138.0000 | 0.00     | 0.36 |
| smiblp-25-20-50-0110-0-2  |         | 43  | 43.0000  | 0.00     | 0.04 |
| smiblp-25-20-50-0110-0-3  |         | 64  | 64.0000  | 0.00     | 0.09 |
| smiblp-25-20-50-0110-0-4  |         | 158 | 158.0000 | 0.00     | 0.23 |
| smiblp-25-20-50-0110-0-5  |         | 62  | 62.0000  | 0.00     | 0.10 |
| smiblp-25-20-50-0110-0-6  |         | 227 | 227.0000 | 0.00     | 0.89 |
| smiblp-25-20-50-0110-0-7  |         | 87  | 87.0000  | 0.00     | 0.18 |
| smiblp-25-20-50-0110-0-8  |         | 11  | 11.0000  | 0.00     | 0.02 |
| smiblp-25-20-50-0110-0-9  |         | 193 | 193.0000 | 0.00     | 0.44 |

# Instance Set INTER-CLIQUE

The instances are available at [http://people.clemson.edu/7Ejcsmith/Test\\_Instances\\_files/BCPIns.zip](http://people.clemson.edu/7Ejcsmith/Test_Instances_files/BCPIns.zip).

Table 8: Results for instance set INTER-CLIQUE.

| instance       | BestSol | LB     | %gap | time [s] |
|----------------|---------|--------|------|----------|
| BCPIns-10-7-10 | 3       | 3.0000 | 0.00 | 0.36     |
| BCPIns-10-7-1  | 3       | 3.0000 | 0.00 | 0.40     |
| BCPIns-10-7-2  | 3       | 3.0000 | 0.00 | 0.30     |
| BCPIns-10-7-3  | 3       | 3.0000 | 0.00 | 0.26     |
| BCPIns-10-7-4  | 3       | 3.0000 | 0.00 | 0.34     |
| BCPIns-10-7-5  | 3       | 3.0000 | 0.00 | 0.30     |
| BCPIns-10-7-6  | 3       | 3.0000 | 0.00 | 0.21     |
| BCPIns-10-7-7  | 2       | 2.0000 | 0.00 | 0.22     |
| BCPIns-10-7-8  | 3       | 3.0000 | 0.00 | 0.23     |
| BCPIns-10-7-9  | 3       | 3.0000 | 0.00 | 0.26     |
| BCPIns-10-9-10 | 3       | 3.0000 | 0.00 | 0.54     |
| BCPIns-10-9-1  | 3       | 3.0000 | 0.00 | 0.62     |
| BCPIns-10-9-2  | 3       | 3.0000 | 0.00 | 0.65     |
| BCPIns-10-9-3  | 3       | 3.0000 | 0.00 | 0.96     |
| BCPIns-10-9-4  | 3       | 3.0000 | 0.00 | 0.97     |
| BCPIns-10-9-5  | 3       | 3.0000 | 0.00 | 0.72     |
| BCPIns-10-9-6  | 3       | 3.0000 | 0.00 | 0.67     |
| BCPIns-10-9-7  | 3       | 3.0000 | 0.00 | 0.68     |
| BCPIns-10-9-8  | 3       | 3.0000 | 0.00 | 0.65     |
| BCPIns-10-9-9  | 3       | 3.0000 | 0.00 | 0.84     |
| BCPIns-12-7-10 | 3       | 3.0000 | 0.00 | 0.87     |
| BCPIns-12-7-1  | 3       | 3.0000 | 0.00 | 0.74     |
| BCPIns-12-7-2  | 3       | 3.0000 | 0.00 | 0.92     |
| BCPIns-12-7-3  | 3       | 3.0000 | 0.00 | 0.79     |
| BCPIns-12-7-4  | 3       | 3.0000 | 0.00 | 0.88     |
| BCPIns-12-7-5  | 3       | 3.0000 | 0.00 | 0.74     |
| BCPIns-12-7-6  | 3       | 3.0000 | 0.00 | 0.76     |
| BCPIns-12-7-7  | 3       | 3.0000 | 0.00 | 0.80     |
| BCPIns-12-7-8  | 3       | 3.0000 | 0.00 | 0.80     |
| BCPIns-12-7-9  | 3       | 3.0000 | 0.00 | 0.76     |
| BCPIns-12-9-10 | 3       | 3.0000 | 0.00 | 1.22     |
| BCPIns-12-9-1  | 3       | 3.0000 | 0.00 | 2.12     |
| BCPIns-12-9-2  | 3       | 3.0000 | 0.00 | 1.34     |
| BCPIns-12-9-3  | 3       | 3.0000 | 0.00 | 1.65     |
| BCPIns-12-9-4  | 3       | 3.0000 | 0.00 | 2.37     |
| BCPIns-12-9-5  | 3       | 3.0000 | 0.00 | 2.39     |
| BCPIns-12-9-6  | 3       | 3.0000 | 0.00 | 1.96     |
| BCPIns-12-9-7  | 3       | 3.0000 | 0.00 | 1.74     |
| BCPIns-12-9-8  | 3       | 3.0000 | 0.00 | 1.83     |
| BCPIns-12-9-9  | 3       | 3.0000 | 0.00 | 2.50     |
| BCPIns-15-7-10 | 3       | 3.0000 | 0.00 | 2.28     |
| BCPIns-15-7-1  | 3       | 3.0000 | 0.00 | 2.02     |
| BCPIns-15-7-2  | 3       | 3.0000 | 0.00 | 2.05     |
| BCPIns-15-7-3  | 3       | 3.0000 | 0.00 | 1.82     |
| BCPIns-15-7-4  | 3       | 3.0000 | 0.00 | 1.74     |
| BCPIns-15-7-5  | 3       | 3.0000 | 0.00 | 2.23     |
| BCPIns-15-7-6  | 3       | 3.0000 | 0.00 | 2.19     |
| BCPIns-15-7-7  | 3       | 3.0000 | 0.00 | 2.45     |
| BCPIns-15-7-8  | 3       | 3.0000 | 0.00 | 2.53     |
| BCPIns-15-7-9  | 3       | 3.0000 | 0.00 | 2.31     |
| BCPIns-15-9-10 | 3       | 3.0000 | 0.00 | 33.69    |
| BCPIns-15-9-1  | 3       | 3.0000 | 0.00 | 6.42     |
| BCPIns-15-9-2  | 3       | 3.0000 | 0.00 | 8.91     |
| BCPIns-15-9-3  | 3       | 3.0000 | 0.00 | 12.04    |
| BCPIns-15-9-4  | 3       | 3.0000 | 0.00 | 3.35     |
| BCPIns-15-9-5  | 3       | 3.0000 | 0.00 | 5.02     |
| BCPIns-15-9-6  | 3       | 3.0000 | 0.00 | 20.34    |
| BCPIns-15-9-7  | 3       | 3.0000 | 0.00 | 11.60    |
| BCPIns-15-9-8  | 3       | 3.0000 | 0.00 | 10.41    |
| BCPIns-15-9-9  | 3       | 3.0000 | 0.00 | 13.75    |
| BCPIns-8-7-10  | 2       | 2.0000 | 0.00 | 0.08     |
| BCPIns-8-7-1   | 2       | 2.0000 | 0.00 | 0.15     |
| BCPIns-8-7-2   | 2       | 2.0000 | 0.00 | 0.13     |
| BCPIns-8-7-3   | 2       | 2.0000 | 0.00 | 0.11     |
| BCPIns-8-7-4   | 3       | 3.0000 | 0.00 | 0.12     |
| BCPIns-8-7-5   | 2       | 2.0000 | 0.00 | 0.10     |

Table 8 – continued from previous page

| instance      | BestSol | LB     | %gap | time [s] |
|---------------|---------|--------|------|----------|
| BCPIns-8-7-6  | 2       | 2.0000 | 0.00 | 0.14     |
| BCPIns-8-7-7  | 3       | 3.0000 | 0.00 | 0.12     |
| BCPIns-8-7-8  | 2       | 2.0000 | 0.00 | 0.08     |
| BCPIns-8-7-9  | 2       | 2.0000 | 0.00 | 0.09     |
| BCPIns-8-9-10 | 3       | 3.0000 | 0.00 | 0.25     |
| BCPIns-8-9-1  | 3       | 3.0000 | 0.00 | 0.23     |
| BCPIns-8-9-2  | 3       | 3.0000 | 0.00 | 0.15     |
| BCPIns-8-9-3  | 3       | 3.0000 | 0.00 | 0.17     |
| BCPIns-8-9-4  | 3       | 3.0000 | 0.00 | 0.21     |
| BCPIns-8-9-5  | 3       | 3.0000 | 0.00 | 0.17     |
| BCPIns-8-9-6  | 3       | 3.0000 | 0.00 | 0.21     |
| BCPIns-8-9-7  | 3       | 3.0000 | 0.00 | 0.26     |
| BCPIns-8-9-8  | 3       | 3.0000 | 0.00 | 0.17     |
| BCPIns-8-9-9  | 3       | 3.0000 | 0.00 | 0.31     |

# Instance Set INTER-FIRE

The instances of this set are available at request from A. Baggio.

Table 9: Results for instance set INTER-FIRE.

| instance              | BestSol | LB      | %gap | time [s] |
|-----------------------|---------|---------|------|----------|
| rndgraph-25-1-3-3-002 | 15      | 15.0000 | 0.00 | 5.64     |
| rndgraph-25-1-3-3-003 | 17      | 17.0000 | 0.00 | 8.18     |
| rndgraph-25-1-3-3-005 | 8       | 8.0000  | 0.00 | 2.24     |
| rndgraph-25-1-3-3-015 | 6       | 6.0000  | 0.00 | 1.44     |
| rndgraph-25-2-2-2-004 | 7       | 7.0000  | 0.00 | 0.61     |
| rndgraph-25-2-2-2-007 | 16      | 16.0000 | 0.00 | 1.54     |
| rndgraph-25-2-2-2-014 | 18      | 18.0000 | 0.00 | 1.50     |
| rndgraph-25-2-2-2-015 | 19      | 19.0000 | 0.00 | 1.48     |
| rndgraph-25-3-3-3-001 | 15      | 15.0000 | 0.00 | 4.84     |
| rndgraph-25-3-3-3-004 | 13      | 13.0000 | 0.00 | 3.72     |
| rndgraph-25-3-3-3-005 | 13      | 13.0000 | 0.00 | 3.75     |
| rndgraph-25-3-3-3-014 | 9       | 9.0000  | 0.00 | 1.33     |
| rndgraph-50-1-3-3-002 | 7       | 7.0000  | 0.00 | 11.05    |
| rndgraph-50-1-3-3-004 | 5       | 5.0000  | 0.00 | 7.70     |
| rndgraph-50-1-3-3-007 | 11      | 11.0000 | 0.00 | 18.07    |
| rndgraph-50-1-3-3-012 | 7       | 7.0000  | 0.00 | 6.64     |
| rndgraph-50-1-5-3-001 | 3       | 3.0000  | 0.00 | 4.58     |
| rndgraph-50-1-5-3-003 | 7       | 7.0000  | 0.00 | 31.05    |
| rndgraph-50-1-5-3-011 | 11      | 11.0000 | 0.00 | 198.61   |
| rndgraph-50-1-5-3-015 | 4       | 4.0000  | 0.00 | 16.49    |
| rndgraph-50-3-5-5-002 | 6       | 6.0000  | 0.00 | 8.29     |
| rndgraph-50-3-5-5-004 | 9       | 9.0000  | 0.00 | 56.35    |
| rndgraph-50-3-5-5-008 | 9       | 9.0000  | 0.00 | 33.94    |
| rndgraph-50-3-5-5-010 | 9       | 9.0000  | 0.00 | 27.40    |
| rndgraph-80-1-3-3-001 | 3       | 3.0000  | 0.00 | 5.41     |
| rndgraph-80-1-3-3-003 | 4       | 4.0000  | 0.00 | 9.57     |
| rndgraph-80-1-3-3-007 | 3       | 3.0000  | 0.00 | 12.32    |
| rndgraph-80-1-3-3-012 | 3       | 3.0000  | 0.00 | 10.95    |
| rndgraph-80-2-2-2-002 | 2       | 2.0000  | 0.00 | 0.84     |
| rndgraph-80-2-2-2-006 | 6       | 6.0000  | 0.00 | 4.36     |
| rndgraph-80-2-2-2-009 | 2       | 2.0000  | 0.00 | 0.88     |
| rndgraph-80-2-2-2-014 | 2       | 2.0000  | 0.00 | 1.02     |
| rndgraph-80-3-3-3-001 | 4       | 4.0000  | 0.00 | 11.76    |
| rndgraph-80-3-3-3-002 | 3       | 3.0000  | 0.00 | 8.28     |
| rndgraph-80-3-3-3-003 | 4       | 4.0000  | 0.00 | 6.80     |
| rndgraph-80-3-3-3-006 | 3       | 3.0000  | 0.00 | 5.30     |
| tree-25-1-3-3-001     | 13      | 13.0000 | 0.00 | 3.22     |
| tree-25-1-3-3-006     | 13      | 13.0000 | 0.00 | 3.23     |
| tree-25-1-3-3-014     | 13      | 13.0000 | 0.00 | 3.64     |
| tree-25-1-3-3-015     | 12      | 12.0000 | 0.00 | 2.89     |
| tree-25-2-2-2-002     | 17      | 17.0000 | 0.00 | 1.53     |
| tree-25-2-2-2-004     | 17      | 17.0000 | 0.00 | 1.80     |
| tree-25-2-2-2-005     | 18      | 18.0000 | 0.00 | 1.65     |
| tree-25-2-2-2-009     | 17      | 17.0000 | 0.00 | 1.43     |
| tree-25-3-3-3-002     | 16      | 16.0000 | 0.00 | 6.96     |
| tree-25-3-3-3-010     | 15      | 15.0000 | 0.00 | 4.97     |
| tree-25-3-3-3-012     | 17      | 17.0000 | 0.00 | 7.40     |
| tree-25-3-3-3-013     | 16      | 16.0000 | 0.00 | 6.35     |
| tree-50-1-3-3-004     | 28      | 28.0000 | 0.00 | 33.79    |
| tree-50-1-3-3-007     | 32      | 32.0000 | 0.00 | 81.12    |
| tree-50-1-3-3-012     | 30      | 30.0000 | 0.00 | 73.77    |
| tree-50-1-3-3-014     | 28      | 28.0000 | 0.00 | 51.78    |
| tree-50-1-5-5-005     | 25      | 25.0000 | 0.00 | 1234.69  |
| tree-50-1-5-5-006     | 26      | 26.0000 | 0.00 | 2120.85  |
| tree-50-1-5-5-007     | 24      | 24.0000 | 0.00 | 1179.44  |
| tree-50-1-5-5-010     | 26      | 26.0000 | 0.00 | 1702.69  |
| tree-50-3-3-1-003     | 30      | 30.0000 | 0.00 | 86.00    |
| tree-50-3-3-1-007     | 31      | 31.0000 | 0.00 | 65.38    |
| tree-50-3-3-1-008     | 26      | 26.0000 | 0.00 | 43.47    |
| tree-50-3-3-1-015     | 27      | 27.0000 | 0.00 | 41.45    |
| tree-80-2-2-2-001     | 56      | 56.0000 | 0.00 | 36.63    |
| tree-80-2-2-2-002     | 63      | 63.0000 | 0.00 | 57.53    |
| tree-80-2-2-2-007     | 61      | 61.0000 | 0.00 | 50.60    |
| tree-80-2-2-2-012     | 57      | 57.0000 | 0.00 | 38.39    |
| tree-80-3-3-1-002     | 45      | 45.0000 | 0.00 | 339.82   |
| tree-80-3-3-1-004     | 48      | 48.0000 | 0.00 | 724.77   |
| tree-80-3-3-1-005     | 48      | 48.0000 | 0.00 | 589.16   |

Table 9 – continued from previous page

| instance          | BestSol | LB      | %gap | time [s] |
|-------------------|---------|---------|------|----------|
| tree-80-3-3-1-015 | 45      | 45.0000 | 0.00 | 361.50   |
| tree-80-3-3-3-004 | 55      | 55.0000 | 0.00 | 1269.52  |
| tree-80-3-3-3-007 | 56      | 56.0000 | 0.00 | 844.68   |
| tree-80-3-3-3-009 | 56      | 56.0000 | 0.00 | 865.83   |
| tree-80-3-3-3-010 | 58      | 58.0000 | 0.00 | 894.75   |
